# Supplementary material
Source: publisher figshare collection journal article supplement (https://diabetesjournals.figshare.com/articles/dataset/_/24045612)
Supplement: Supplementary file 1 [file 1]

Supplementary Table 1: Log transformations applied in the analysis.

| <b>Measures</b>          | <b>Transformations</b> |
|--------------------------|------------------------|
| Glucose MAUC (mg/dL)     | $\text{Log}(x)$        |
| C-peptide MAUC (pmol/mL) | $\text{Log}(x+1)$      |
| GADA Titer (DK units/mL) | $\text{Log}(x+50)$     |
| IA2A Titer (DK units/mL) | $\text{Log}(x+1000)$   |
| IAA Titer (index)        | $\text{Log}(x+0.001)$  |
| ICA Titer (index)        | $\text{Log}(x+5)$      |
| ZnT8A Titer (index)      | $\text{Log}(x+0.01)$   |

Supplementary Table 2: Follow-up Summary and Impact of Missed Tests Due to COVID-19 Pandemic

|                                                            | <b>Hydroxychloroquine</b> |                  | <b>Placebo</b>   |                  |
|------------------------------------------------------------|---------------------------|------------------|------------------|------------------|
|                                                            | Met Endpoint              | No Endpoint      | Met Endpoint     | No Endpoint      |
| Total Number                                               | 41                        | 127              | 21               | 62               |
| Median (IQR) Time to Endpoint/Last Follow-Up Time (Months) | 18.6 (12.9-25.0)          | 24.6 (12.7-36.7) | 18.6 (12.7-30.5) | 24.9 (13.1-36.0) |
| Has Unconfirmed Abnormal OGTT, Re-Tested Within 1 Year     | 6                         | 27               | 5                | 13               |
| Has Unconfirmed Abnormal, Not Re-Test Within 1 Year        | 4                         | 8                | 2                | 5                |
| No Issues                                                  | 31                        | 92               | 14               | 44               |

Supplementary Table 3: Adverse events. The table below tabulates the adverse events restricted to Grades 2 or greater and the causality to Possibly related, probably related, or definitely related.

|                                      | <b>Hydroxychloroquine</b> |                    | <b>Placebo</b>   |                    |
|--------------------------------------|---------------------------|--------------------|------------------|--------------------|
|                                      | Number of Events          | Number of Subjects | Number of Events | Number of Subjects |
| Nervous system disorders             | 6                         | 5 (2.73%)          | 1                | 1 (1.11%)          |
| Investigations                       | 4                         | 3 (1.64%)          | 0                | 0 (0.00%)          |
| Blood and lymphatic system disorders | 1                         | 1 (0.55%)          | 0                | 0 (0.00%)          |

TN-22 Accrual Rate, Pre vs Post COVID-19

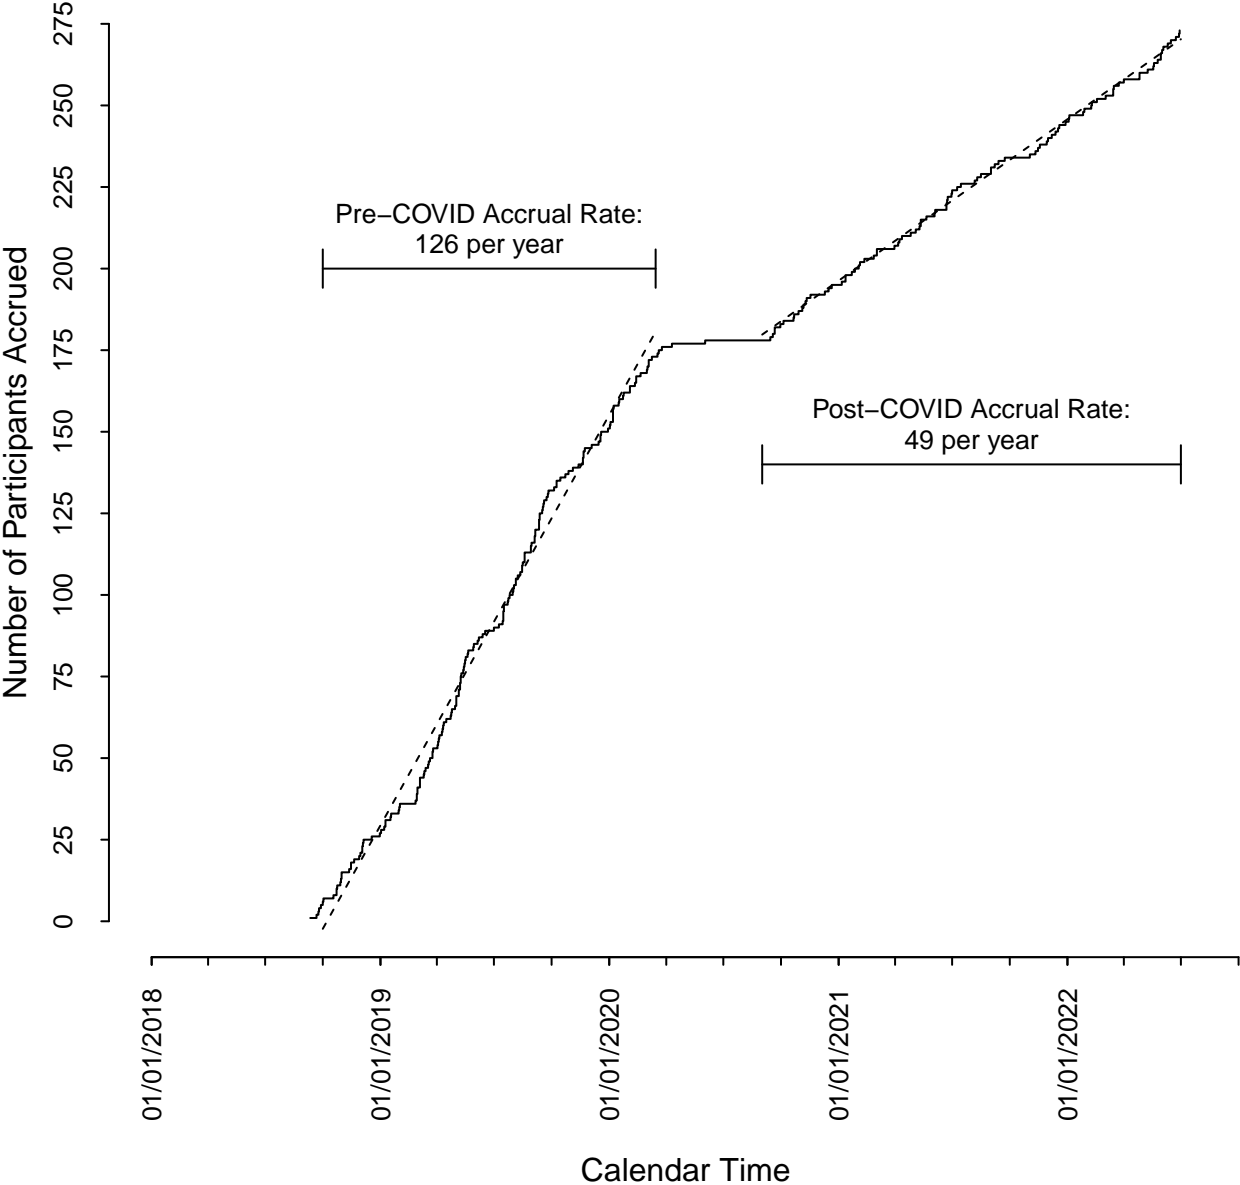

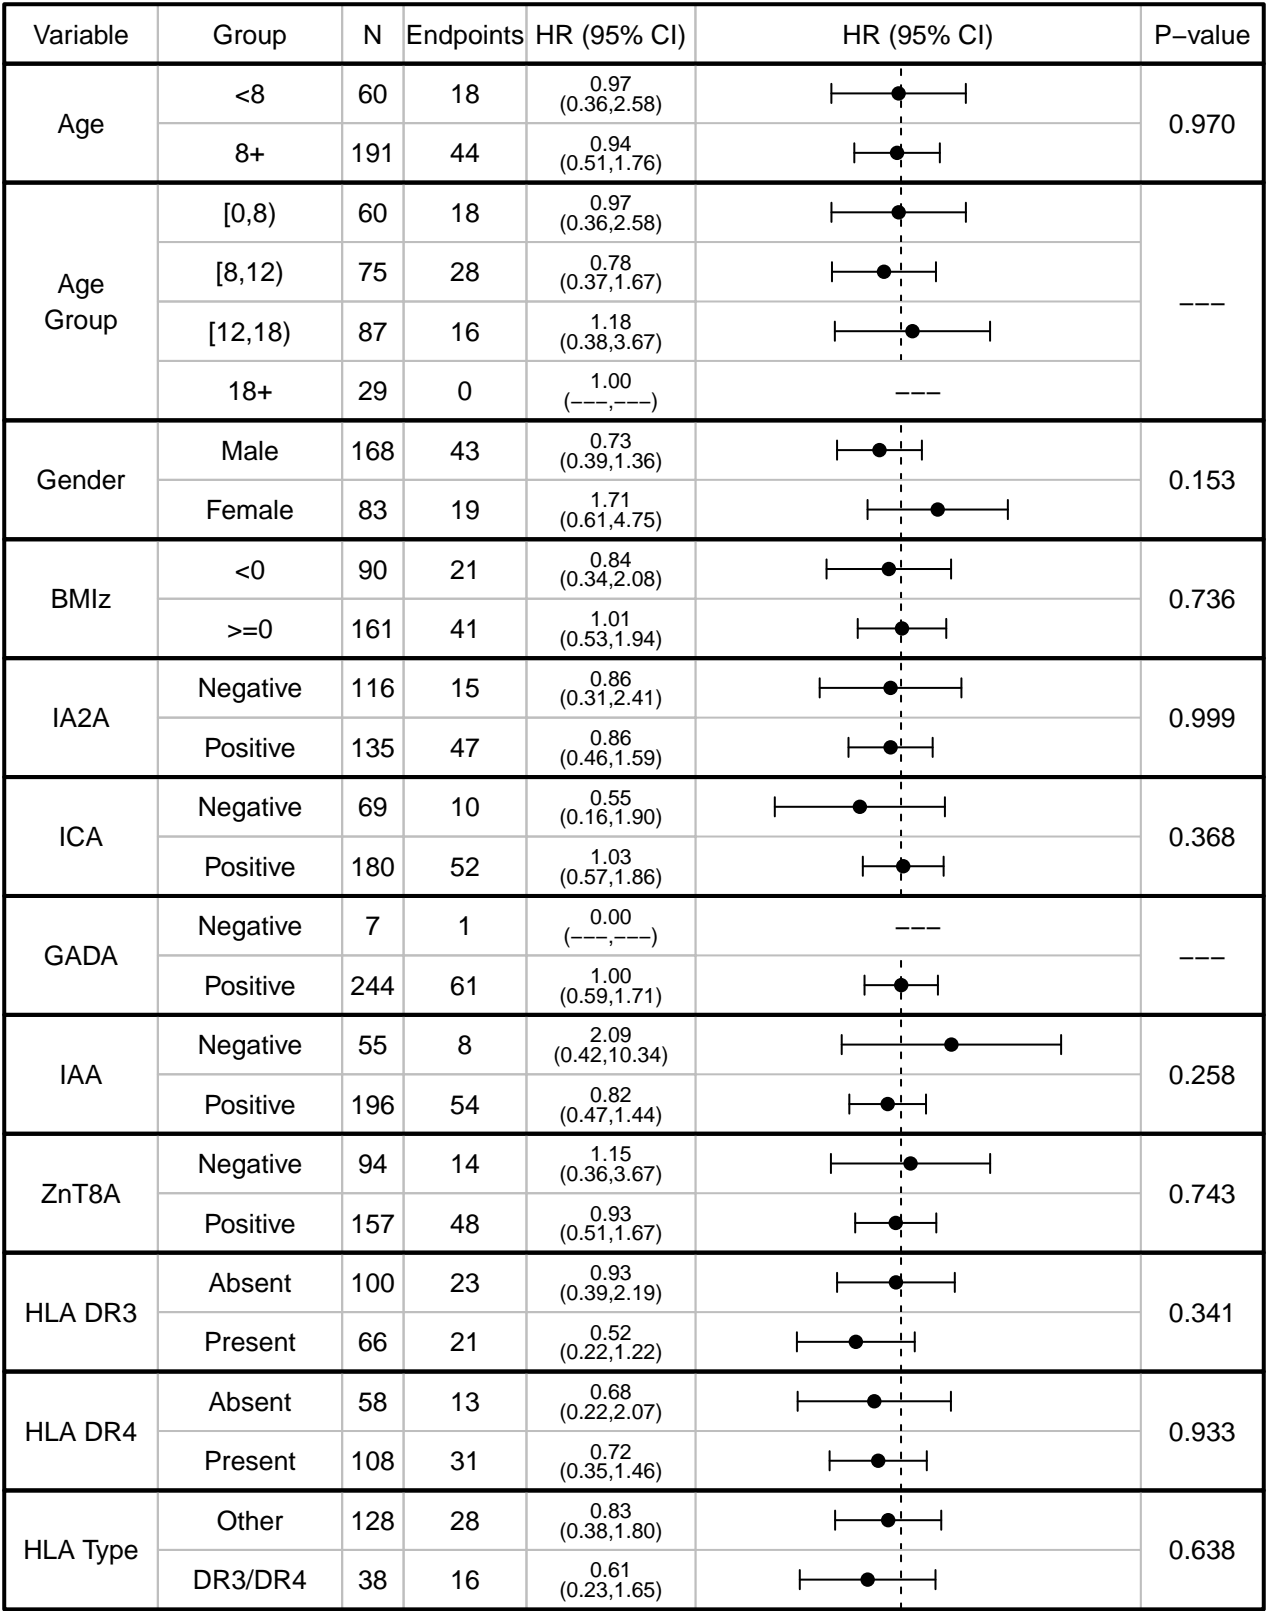

Supplementary Figure 2: Treatment interactions among predefined subgroups.

Supplementary Figure 3: BMI in the two treatment arms.

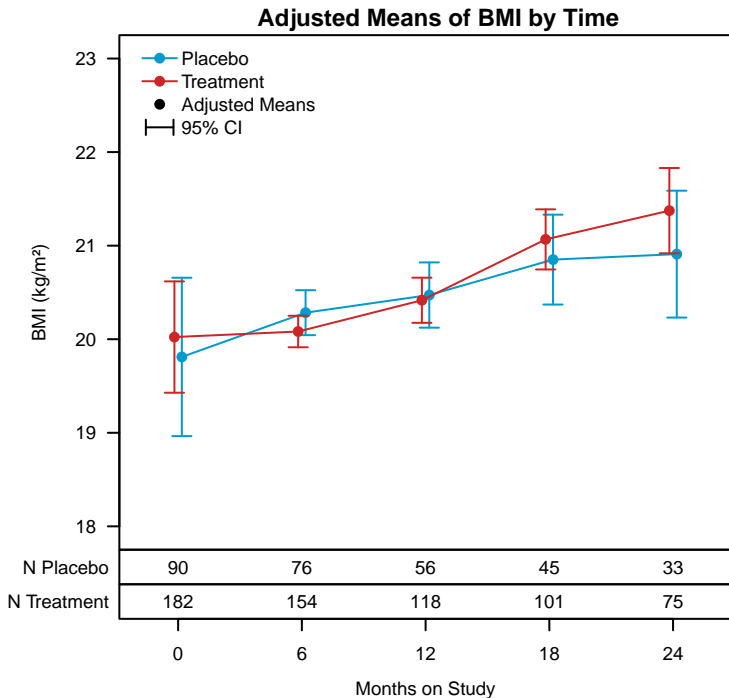

# Adjusted Means of GADA Titers Over Time via ANCOVA

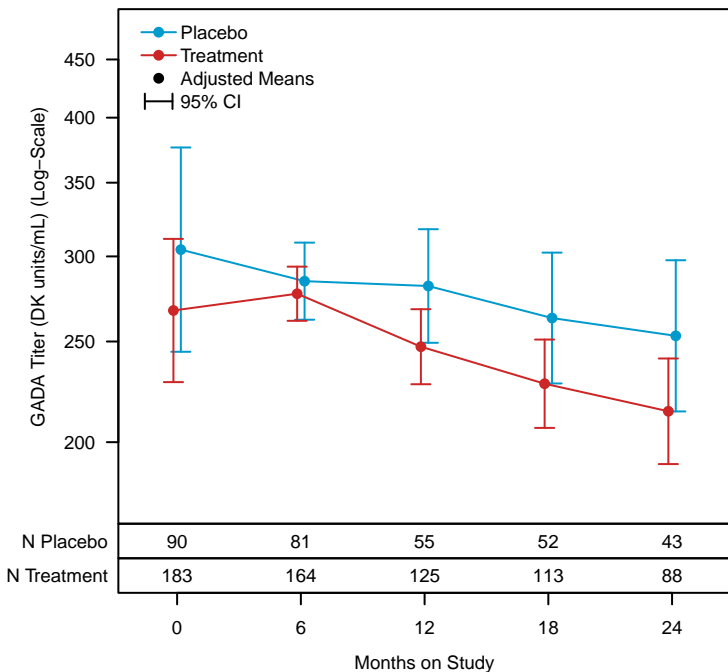

# Adjusted Means of IAA Titters Over Time via ANCOVA

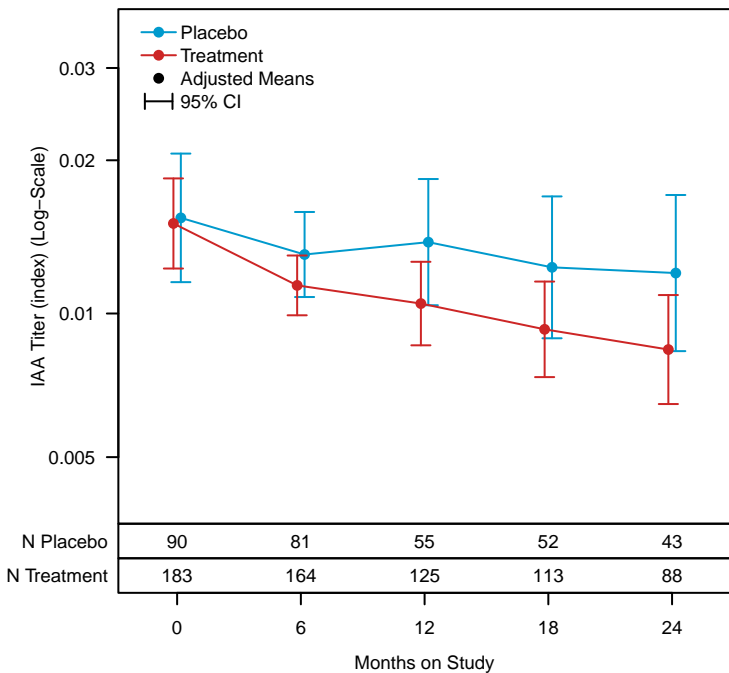



Supplementary Figure 4: Effects of hydroxychloroquine in the titers of anti-GAD and anti-insulin antibodies in individuals who had these autoantibodies at the time of enrollment. (A) The slope of the GADA was -0.055 U/month in the placebo and -0.114 U/month in the hydroxychloroquine treatment groups ( $p=0.036$ ). (B) the slopes of the IAA titers were -0.052 in the placebo and -0.245 U/month in the hydroxychloroquine group ( $p=0.011$ ). The number of participants with positive autoantibodies are shown on the bottom of each graph. The mean  $\pm$  95% CI are shown.
