# Supplementary material
Source: publisher figshare collection journal article supplement (https://diabetesjournals.figshare.com/articles/dataset/_/24045612)
Supplement: Supplementary file 2 [file 1]

Collaborators:

Andrea Steck, MD, Barbara Davis Center for Childhood Diabetes

Carla J. Greenbaum, MD, Sandra Lord, MD, Benaroya Research Institute

Roshanak Monzavi, MD, Children's Hospital of Los Angeles

Lorraine Levitt Katz, MD, Children's Hospital of Philadelphia

Robin Goland, MD, Columbia University

Andrew Muir, MD, Emory Children's Center

Elaine Apperson, MD, GHS – Pediatric Endocrinology; Linda DiMeglio, MD, Indiana University

Elizabeth Cummings, MD, IWK Health Center; Ruth Weinstock, MD, PhD, Joslin Center at SUNY Upstate Medical University

Jason Gaglia, MD, MMSc, Joslin Diabetes Center

Fiona Campbell, MD, Leeds Teaching Hospital NHS Trust

Susanne Cabrera, MD, Medical College of Wisconsin

Samer Nakhle, MD, Palm Research Center, Inc.

Patrick English, MD, MRCP, Plymouth Diabetes Research Unit

Tony Huynh, MBBS, PhD, FRACP, FRCPA, Queensland Children's Hospital

David Liljenquist, MD, Rocky Mountain Diabetes and Osteoporosis Center

Christopher Moudiotis, MD, Royal Devon & Exeter Hospital; Sally-Anne Duke, MBBS, FRACP, MIPH, Royal North Shore Hospital

Emanuele Bosi, MD, San Raffaele Hospital

Kurt Griffin, MD, Sanford Children's Specialty Clinic

Henrik Borg, MD, Skane University Hospital (SUS); Ake Lernmark, PhD, Skane University Hospital (SUS)

Daniel Flynn, MD, St. Luke's Humphreys Diabetes Center

Darrell Wilson, MD, Stanford University

Maria Craig, MBBS, PhD, FRACP, MMed, The Children's Hospital at Westmead

Wayne Moore, MD, PhD, The Children's Mercy Hospital

Diane Wherrett, MD, The Hospital for Sick Children

Danijela Tatovich, MD, University of Bristol

Stephen Gitelman, MD, University of California - San Francisco

Louis Philipson, MD, PhD, University of Chicago

Michael Haller, MD, University of Florida

Mikael Knip, MD, PhD, University of Helsinki

Eva Tsalikian, MD, University of Iowa, Children's Hospital of Iowa

David Baidal, MD, University of Miami

Inas Thomas, MD, University of Michigan Health System

Antoinette Moran, MD University of Minnesota

Ingrid Libman, MD, PhD, MPH, University of Pittsburgh

Perrin White, MD, University of Texas Southwestern

Vandana Raman, MD, Zoe Raleigh, MD, University of Utah

Christine Solorzano, MD, University of Virginia Health System

Henry Rodriguez, MD, USF Diabetes Center

William Russell, MD, Vanderbilt Eskind Diabetes Clinic

Michelle So, MBBS, PhD, Peter Colman, AC, FAA, FTSE, FRA, Walter and Eliza Hall Institute of Medical Research

Jennifer Couper, MD, FRACP, Women's and Children's Hospital, Adelaide

Jennifer Sherr, MD, PhD, Yale University School of Medicine;
