# Supplementary material
Source: publisher figshare collection journal article supplement (https://diabetesjournals.figshare.com/articles/dataset/_/24045612)
Supplement: Supplementary file 3 [file 2]

**ONLINE APPENDIX. Type 1 Diabetes TrialNet Study Group.  
Personnel as of 4/19/2023.**

**Steering Committee:** Kevan Herold (Yale University), Mark Anderson (University of California, San Francisco), Mark A. Atkinson (University of Florida), Todd Brusko (University of Florida), Jane Buckner (Benaroya Research Institute), Mark Clements (The Children's Mercy Hospital), Mark Daniels (Children's Hospital of Orange County), Linda DiMeglio (Indiana University), Carmella Evans-Molina (Indiana University), Jason Gaglia (Joslin Diabetes Center), Stephen E. Gitelman (University of California, San Francisco), Robin Goland (Columbia University), Peter Gottlieb (Barbara Davis Center for Childhood Diabetes), Carla J. Greenbaum (Benaroya Research Institute), Michael Haller (University of Florida), Martin Hessner (Medical College of Wisconsin), Dirk Homann (Icahn School of Medicine at Mount Sinai), Jeffrey P. Krischer (University of South Florida), Megan Levings (University of British Columbia), Ingrid Libman (University of Pittsburgh), Peter Linsley (Benaroya Research Institute), Alice Long (Benaroya Research Institute), Sandra Lord (Benaroya Research Institute), Eoin McKinney (Cambridge Institute for Medical Research), Wayne Moore (The Children's Mercy Hospital), Antoinette Moran (University of Minnesota), Andrew Muir (Emory Children's Center), Priya Pralahad (Stanford University), Maria Redondo (Baylor College of Medicine), William Russell (Vanderbilt Eskind Diabetes Clinic), Jennifer Sherr (Yale University), Lisa Spain (National Institute of Diabetes and Digestive and Kidney Diseases [NIDDK]), Cate Speake (Benaroya Research Institute), Andrea Steck (Barbara Davis Center for Childhood Diabetes), John Wentworth (Walter & Eliza Hall Institute of Medical Research), Diane Wherrett (University of Toronto), Perrin White (University of Texas Southwestern), Darrell M. Wilson (Stanford University), William Winter (University of Florida).

**Past Members:** Peter Antinozzi (Wake Forest University), David A. Baidal (University of Miami), Manuela Battaglia (San Raffaele University), Dorothy Becker (University of Pittsburgh), Penelope Bingley (University of Bristol), Emanuele Bosi (San Raffaele University), Peter G. Colman (Walter & Eliza Hall Institute of Medical Research), Richard Insel (JDRF), Thomas Kay (St. Vincent's Institute of Medical Research), Mikael Knip (University of Helsinki), Åke Lernmark (Skane University Hospital), Yuk-Fun Liu (University of Bristol), Jennifer B. Marks (University of Miami), Jerry Palmer (University of Washington), Mark Peakman (King's College), Louis Philipson (University of Chicago), Alberto Pugliese (University of Miami), Philip Raskin (University of Texas Southwestern), Maria Redondo (Baylor College of Medicine), Henry Rodriguez (University of South Florida Diabetes and Endocrinology Center), Bart Roep (Leiden University Medical Center), Desmond A. Schatz (University of Florida), Jay S. Skyler (University of Miami), Jay M. Sosenko (University of Miami), Jorma Toppari (Hospital District of Southwest Finland), Anette Ziegler (Technical University Munich).

**Executive Committee:** Kevan Herold, (Yale University), Linda DiMeglio (Indiana University), Carla J. Greenbaum (Benaroya Research Institute), Jeffrey P. Krischer (University of South Florida), Ellen Leschek (National Institute of Diabetes and Digestive and Kidney Diseases

[NIDDK]), Lisa Spain (National Institute of Diabetes and Digestive and Kidney Diseases [NIDDK]).

**Past Members:** Katarzyna Bourcier (National Institute of Allergy and Infectious Diseases [NIAID]), Richard Insel (JDRF), John Ridge (National Institute of Allergy and Infectious Disease [NIAID]), Jay S. Skyler (University of Miami).

**Chair's Office:** Kevan Herold, (Yale University), Lisa Rafkin (University of Miami).

**Past Members:** Carla J. Greenbaum (Benaroya Research Institute), Irene Santiago (University of Miami), Jay S. Skyler (University of Miami), Jay Sosenko (University of Miami).

**TrialNet Coordinating Center (University of South Florida):** Jeffrey P. Krischer, Brian Bundy, Michael Abbondandolo, Rajesh Adusumalli, Matthew Boonstra, Jessica Cooper, Jessica Conaty, David Cuthbertson, Julie Ford, Jennifer Garmeson, Veena Gowda, Cameron Hainline, Brian Hays, Kathleen Heyman, Christina Karges, Amy Kunz, Shu Liu, Kristin Maddox, Colleen Maguire, Margaret Moore, Sarah Muller, Melissa Murray, Johanna Nesbitt, Ryan O'Donnell, Melissa Parker, MJ Pereyra, Francisco Perez Laras, Erica Perri, Aswani Raheja, Devon Rizzo, Ariana Rojas, Cintia Reichert, Lisa Steward, Michael Taylor, Roy Tamura, Dena Tewey, Elon Walker-Veras, Jianmei Wang, Melissa Wroble, Lili Wumser, Lu You, Kenneth Young.

**Past Members:** Timothy Adams, Logan Alford, Darlene Amado, Ilma Asif, Jenna Bjellquist, Laura Bocchino, Cristina Burroughs, Mario Cleves, Meagan DeSalvatore, Christopher Eberhard, Steve Fiske, Susan Geyer, Courtney Henderson, Martha Henry, Belinda Hsiao, Amanda Kinderman, Beata-Gabriela Koziol, Lindsay Lane, Ashley Leinbach, Jennifer Lloyd, Jamie Malloy, Julie Martin, Cameron McNeill, Jessica Miller, Thuy Nguyen, Jodie Nunez, Nichole Reed, Amy Roberts, Kelly Sadler, Tina Stavros, Christine Sullivan, Megan V. Warnock, Keith Wood, Rebecca Wood, Ping Xu, Vanessa Yanek.

**National Institute of Diabetes and Digestive and Kidney Diseases [NIDDK]:** Ellen Leschek, Lisa Spain.

**Data Safety and Monitoring Board:** Emily Blumberg (University of Pennsylvania), Sean Aas (Georgetown University), Gerald Beck (Cleveland Clinic Foundation), Rose Gubitosi-Klug (Case Western Reserve University), Dennis Wallace (Retired).

**Past Members:** David Brillon (Cornell University), Lori Laffel (Joslin Diabetes Center), Robert Veatch (Georgetown University), Robert Vigersky (Medtronic).

**Infectious Disease Safety Committee:** Brett Loecheit (Children's National Medical Center), Lindsey Baden (Brigham and Women's Hospital), Peter Gottlieb (Barbara Davis Center for Childhood Diabetes), Michael Green (University of Pittsburgh), Ellen Leschek (National Institute of Diabetes and Digestive and Kidney Diseases [NIDDK]), Ingrid Libman (University of Pittsburgh), Adriana Weinberg (University of Colorado), John Wentworth (Walter & Eliza Hall Institute of Medical Research).

**Past Members:** Nora Bryant (Joslin Diabetes Center), Yuk-Fun Liu (University of Bristol).

**Laboratory Directors:** Michael Sheldon (Infinity BiologiX), Clive Wasserfall (University of Florida), Adriana Weinberg (University of Colorado), William Winter (University of Florida), Liping Yu (Barbara Davis Center for Childhood Diabetes).

**Past Members:** Santica Marcovina (University of Washington), Jay Tischfield (Rutgers University).

**TrialNet Clinical Network Hub (Benaroya Research Institute):** Arielle Pagryzinski, Emily Batts, Katelyn Orcino, Danielle Tom, Chris Budy.

**Past Members:** Annie Schultz, Kristin Fitzpatrick, Randy Guerra, Catherine Nguyen, Melita Romasco, Annie Shultz, Mary Ramey, Michele Patience-Staal, Meghan Tobin, Diana Skye, Christopher Webb.

**Active Personnel at Clinical Centers Participating in the TN22 Protocol:**

**Barbara Davis Center for Childhood Diabetes, Aurora, Colorado:** Peter Gottlieb, Andrea Steck, Taylor Triolo, Lexie Chesshir, Alison Goforth, Aaron Michels, Marian Rewers, Kimber Simmons, Fatima Tensun, Leah Galvez Valencia, Ruthie Williamson.

**Benaroya Research Institute, Seattle, Washington:** Carla Greenbaum, Jane Buckner, Katie Bennett, Sandra Lord, Sunitha Murali, Bao Ng, Cate Speake, Corinna Tordillos, William Thornton, Dana VanBuecken, Kimberly Varner, Heather White, Nancy Wickstrom, Cassandra Williams, Alyssa Ylescupidez.

**The Children's Hospital of Orange County:** Amrit Bhangoo, Mark Daniels, Daina Dreimane, Mark Daniels, Marissa Erickson, Timothy Flannery, Nikta Forghani, Sarah Hu, Himala Kashmiri, Anabel Palencia, Christina Reh, Francoise Sutton, Heather Speer, Lien Trihn, Hunter Vallejo.

**The Children's Mercy Hospital, Kansas City, Missouri:** Wayne Moore, Fadi Al Muhaisen, Jennifer Boyd, Mark Clements, Richard Dugan-Starr, Aliza Elrod, Katelyn Evans, Kelsee Halpin, Heather Harding, Jennifer James, Terri Luetjen, Ryan McDonough, Susan Mitchell, Kathleen Noland, Emily Paprocki, Rhiannon Pomerantz, Krystin Quilty Sanford, Luis Sainz y Diaz, Cintya Schweisberger, Britaney Spartz.

**Columbia University, New York, New York:** Robin Goland, Magdalena Bogun, Rachelle Gandica, Jacqueline Lonier, James Pring, Nathan Schwab, Kristen Williams.

**Emory Children's Center, Atlanta, Georgia:** Andrew Muir, Amber Antich, Mone Anzai, Kristina Cossen, Eric Felner, Lynette Gonzalez, Wanda Sanchez, Derrick Scott, Catherine Simpson.

**The Hospital for Sick Children, Toronto, Ontario:** Diane Wherrett, Lesley Eisel, Camille Morris, Mary Jo Ricci.

**Indiana University, Indianapolis, Indiana:** Linda DiMeglio, Carmella Evans-Molina, Jamie Felton, Heba Ismail, Gabriela Monaco, Anna Neyman, Juan Sanchez, Emily Sims.

**Joslin Diabetes Center:** Jason Gaglia, Christina Astley, Albert Hwa, David Kim, Maria Koen, Mikayla Mackey, Hannah Na, Brittany Resnick.

**San Raffaele Hospital:** Emanuele Bosi, Eleonora Bianconi, Ricardo Bonfanti, Amelia Caretto, Giulio Frontino, Pauline Grogan, Andrea Laurenzi, Sabina Martinenghi, Aurora Merolla, Nicola Minuto, Chiara Molinari, Matteo Pastore, Alessandra Petrelli.

**Skane University Hospital (SUS):** Henrik Borg, Ake Lernmark, Linda Ahlkvist, Anastasia Katsarou, Helena Larsson, Markus Lundgren, Ulrika Ulvenhag.

**Stanford University, Stanford, California:** Darrell Wilson, Bonnie Baker, Karen Barahona, Priya Prahalad, Trudy Esrey.

**University of Bristol, UK:** Danijela Tatovich, Yuk-Fun Liu, Sharon Merritt, Sam Loud, Georgina Williams, Beth Thorne, Sharon Tovey.

**University of California, San Francisco, California:** Stephen Gitelman, Fatema Abdulhussein, Natalie Aceves, Mark Anderson, Julissa Cabrera, Hannah Chessner, Abby Cobb-Walch, Laura Dapkus, Aristides Diamant, Marysol Gonzales Granados, Tina Hu, Karen Ko, Janet Lee, Roger Long, Isabella Niu, Srinath Sanda, Caroline Schulmeister, Priya Srivastava, Lorraine Stiehl, Christine Torok, Rebecca Wesch, Jenise Wong, Kevin Yen.

**University of Florida, Gainesville, Florida:** Michael Haller, Mark Atkinson, Brittany Bruggeman, Todd Brusko, Miriam Cintron, Kristin Dayton, Timothy Foster, Jennifer Hosford, Laura Jacobsen, Sarah Peeling, Danielle Poulton, Desmond Schatz, William Winter.

**University of Helsinki:** Mikael Knip, Marja Salonen.

**University of Minnesota, Minneapolis, Minnesota:** Antoinette Moran, Shannon Beasley, Melena Bellin, Jane Kennedy, Janice Leschyshyn, Brandon Nathan, Beth Pappenfus, Ihsan Rizky, Muna Sunni.

**University of Pittsburgh, Pittsburgh, Pennsylvania:** Ingrid Libman, Dorothy Becker, Kelli DeLallo, Christine March, Carly Shelleby, Frederico Toledo.

**University of Texas Southwestern, Dallas, Texas:** Perrin White, Abha Choudhary, Yasmin Dominguez, Jamie Girard, Michelle Murphy, Philip Raskin, Serey Sao.

**Vanderbilt Eskind Diabetes Clinic, Nashville, Tennessee:** William Russell, Faith Brendle, Justin Gregory, Brenna Hammel, Stephanie Kovacs, Jenny Leshko, Daniel Moore, Kimberly Rainer, Tyler Smith.

**Walter and Eliza Hall Institute of Medical Research, Parkville, Victoria:** Peter Colman, Michelle So, John M. Wentworth, Marika Bjoransen, Spiros Furlanos, Leonard Harrison, Felicity Healy, Leanne Redl, Rebecca Sweet.

**Yale University, New Haven, Connecticut:** Jennifer Sherr, Kevan Herold, Lori Carria, Marcia DeSousa, William Tamborlane, Eileen Tichy, Stuart Weinzimer, Kate Weyman.
